1 **Off-label use in Palliative Care – more common**  
2 **than expected. A retrospective chart review**

3 Vera Hagemann<sup>1</sup>

4 Claudia Bausewein PhD<sup>1</sup>

5 Constanze Rémi MSc<sup>1,2</sup>

6 1 Department of Palliative Medicine, Munich University Hospital, Ludwig-Maximilians-  
7 University Munich, Germany

8 2 Hospital Pharmacy, Munich University Hospital, Ludwig-Maximilians-University  
9 Munich, Germany

10

11 Corresponding author:

12 Constanze Rémi MSc

13 Department of Palliative Medicine and Hospital Pharmacy

14 Munich University Hospital

15 Marchioninstr. 15

16 81377 München, Germany

17 Phone: +49(0)89 4400 74962

18 Fax: +49(089) 4400 77921

19 Email: [constanze.remi@med.uni-muenchen.de](mailto:constanze.remi@med.uni-muenchen.de)

20 Orcid ID 0000-0001-7655-0306

21 **Keywords** palliative care, off-label use, evidence-based medicine, quality of health  
22 care, safety

23 **Word count:** 3035

24 **Reference count:** 24

25 **Abstract**

26 **Objective**

27 Off-label drug use seems to be integral to palliative care pharmacotherapy. Balancing  
28 potential risks and benefits in the context of limited therapeutic options is challenging.  
29 To provide specific support for clinicians in dealing with off-label use, it is essential to  
30 understand off-label use in everyday clinical practice.

31 The aim of this pilot study was to quantify and describe off-label use in a palliative  
32 care unit.

33 **Methods**

34 Retrospective chart review of all adult patients treated on a palliative care unit in  
35 10/2017. All data on drug use e.g. indication, dose, route of administration were  
36 extracted and matched with the prescribing information. Identified off-label use was  
37 subsequently compared with recommendations in the relevant literature. The main  
38 outcome measure was frequency and type of off-label drug use.

39 **Results**

40 2,352 drug application days (d) and 93 drugs were identified for 28 patients. Of all  
41 drugs, 47 (51%) were used off-label at least once. Most off-label uses concerned  
42 indication (57%), followed by mode of administration. In drugs highly relevant to  
43 palliative care the rate of off-label use was as high as 67%. The extent to which off-  
44 label therapy was supported by literature was very variable and ranged from 0 to  
45 88%.

46 **Conclusions**

47 This single-unit data confirms the high prevalence of off-label use in palliative  
48 medicine and demonstrates that off-label use in palliative care is very multifaceted.  
49 The data presented allows for a more precise characterization of various aspects of  
50 off-label use in order to derive concrete further measures for research and clinical  
51 practice.

52

53

54

55 **What is already known on this subject**

- 56 • Off-label drug use is likely to be common in palliative care, but detailed data is  
57 very limited
- 58 • Off-label drug use is a potential threat for patient safety
- 59 • Physicians state to make therapeutic decisions based on their own experience,  
60 due to a lack of available evidence and lack of support in assessment

61 **What this study adds**

- 62 • off-label use in palliative care is multifaceted
- 63 • the mode of administration (e.g. combination with other drugs in a syringe  
64 driver) is beside indication a common reasons for off label use
- 65 • the proportion of off-label use without sound evidence is high.

66

## 67 Introduction

68 The aim of palliative care is to improve quality of life of patients with advanced  
69 diseases. Drug therapy is a mainstay in the treatment of physical symptoms.  
70 However, based on the few data available so far, it can be assumed that up to a  
71 quarter of all prescribed drugs are used outside the scope of the marketing  
72 authorization in palliative care<sup>1-4</sup>. In general, "off-label use" refers to all deviations  
73 from the approval (license) of the drug, for example with regard to indication, route of  
74 administration, dosage interval or duration of treatment<sup>5, 6</sup>.

75 In contrast to other medical disciplines, the management of patients towards the end  
76 of life does not focus on curative or disease-modifying treatment approaches but on  
77 the alleviation of distressing symptoms. Often, only the route of administration or  
78 dosage differs from the manufacturer's approval. The existing evidence for off-label  
79 use in palliative medicine is very heterogeneous, e.g. with good evidence for the use  
80 of opioids for breathlessness<sup>7</sup> but only very limited evidence with case reports and  
81 small studies on the frequent practice of subcutaneous infusion of midazolam (e.g.<sup>8,</sup>  
82 <sup>9</sup>).

83 Off-label use involves both medical and legal challenges. It always carries the  
84 potential risk of a drug that has not been tested or insufficiently tested for its intended  
85 use and thus is a potential threat for patient safety<sup>10</sup>. Additionally, off-label use can  
86 lead to limited coverage of treatment costs by insurance companies or changes in  
87 liability for treatment related harm<sup>11</sup>.

88 Accordingly, it should be applied consciously and well-considered. In clinical practice,  
89 however, there is often a lack of time and resources to conduct a patient-specific risk-  
90 benefit analysis for each therapy on the basis of the current literature and available  
91 alternatives<sup>1</sup>. Achieving the Hippocratic principle of "Primum non nocere" ("first, do  
92 no harm") is therefore often a major challenge. Physicians regularly make therapeutic  
93 decisions based on their own experience, especially due to lack of available evidence  
94 and lack of support in assessment<sup>11</sup>. They express concerns about the safety of drug  
95 therapy<sup>11</sup>. To date, there are only limited data to provide a sound evidence-base for  
96 decision-making on the use of drugs in palliative medicine. In addition, such studies  
97 are difficult to conduct due to methodological difficulties. Pharmacists can play an  
98 important role in the off-label medication process. Potential tasks include:

99 identification of off-label therapies, assisting in the interpretation of the available  
100 evidence, evaluation of possible treatment alternatives and support in the patient-  
101 specific benefit-risk assessment<sup>12</sup>.

102 For providing specific support for clinicians in dealing with off-label use, it is essential  
103 to understand off-label use in everyday clinical practice. This includes not only the  
104 prevalence but also the clinical circumstances, the underlying evidence and the  
105 decision-making processes. Based on this knowledge it is only possible to decide  
106 whether measures should be taken to increase safety of therapy and make it possibly  
107 more effective for the patient. At the same time, however, such measures can also  
108 help to give prescribers more security in dealing with off-label use.

109 As little is known about off-label use in palliative medicine in Germany and  
110 internationally<sup>1, 11</sup>, the aim of this pilot study was to quantify and describe off-label  
111 use in adult patients treated on a palliative care unit.

112

## 113 **Methods**

114 Medical charts of patients treated in the palliative care unit of the Department of  
115 Palliative Medicine at Munich University Hospital between 1<sup>st</sup> and 31<sup>st</sup> October 2017  
116 were retrospectively reviewed. The reporting of this chart review complies with the  
117 STROBE criteria for reporting cross-sectional studies<sup>13</sup>.

118

119 The palliative care unit at Munich University Hospital provides acute palliative care  
120 for patients with advanced disease. Annually, about 300 patients are treated in the  
121 unit (286 in 2017) of which about 40% are discharged. Patients suffer predominantly  
122 from malignant (about 75%) and non-malignant disease.

123 Prescribing data was extracted for all drugs administered on the unit during October  
124 2017 using an extraction sheet. This month was randomly selected from all months  
125 of the year with typical patient case numbers for the unit. The extraction sheet was  
126 piloted by two persons and subsequently modified. Data was extracted by two  
127 pharmacy students and data integrity randomly checked by two pharmacists. The  
128 recording encompassed active generic drug, trade name, indication, dose, dosing

129 interval, route of administration, mode of administration, and duration of therapy.  
 130 Drug applications were recorded as application days, i.e. every day on which a drug  
 131 was administered per patient and not every single dose was counted. This was to  
 132 avoid bias due to short rather than long dosing intervals. The data obtained was  
 133 compared with the prescribing information to identify off-label applications. An  
 134 application day was rated as off-label when a drug was applied for an aspect outside  
 135 the scope of the marketing authorisation regarding indication, drug dose, dosing  
 136 interval, route of administration, mode of administration (e.g. crushed, via feeding  
 137 tube, combination with other drugs in syringe driver, continuous infusion), and  
 138 duration of therapy (s. table 1). This was also the case if, for example, morphine was  
 139 used in an approved indication (pain) but mixed with other substances in the same  
 140 infusion for administration. Off-label use was subsequently compared with  
 141 recommendations in the German Guideline on Palliative Medicine for Patients with  
 142 Incurable Cancer<sup>14</sup> and the German Palliative Care Formulary<sup>15</sup> in order to identify  
 143 drug uses outside the scope of the marketing authorisation but within the range of  
 144 official or accepted therapy recommendations.

145

| <b>Off-label use type</b>      | <b>explanation</b>                                                            | <b>example</b>                                 |
|--------------------------------|-------------------------------------------------------------------------------|------------------------------------------------|
| <b>indication</b>              | use for an non-labelled indication                                            | morphine for dyspnea                           |
| <b>dose</b>                    | use of a higher or lower dose than licensed                                   | citalopram 40mg/d for a patient >65 years      |
| <b>dosing interval</b>         | administration of a drug in a shorter or longer dosing interval than approved | daily change of a fentanyl patch               |
| <b>route of administration</b> | administration via a non licensed route                                       | midazolam subcutaneously                       |
| <b>mode of administration</b>  | deviations from the approved mode of administration                           | continuous infusion of levetiracetam           |
| <b>duration of therapy</b>     | deviations from the authorized duration of therapy                            | use of metoclopramide for 10 days              |
| <b>dose titration</b>          | a different dose-titration regimen compared to the marketing                  | increasing the pregabalin dose every other day |

146 Tab.1 Off-label use types with explanations and examples from palliative care  
147 practice

148

149 In addition, the following patient data were recorded anonymously: age, disease  
150 (malignant/non-malignant) and sex.

151 The evaluation of ambiguous prescriptions was discussed between two pharmacists,  
152 for example several or unclear indications of a drug.

153 A committee consisting of two pharmacists and a doctor additionally divided the  
154 identified drugs into three categories based on their relevance in symptom control in  
155 palliative medicine: 1. high relevance, 2. medium relevance, 3. low relevance.

156 Drugs in the first group (high relevance) included those typically used in symptom  
157 control in palliative medicine based on published data and personal experience<sup>14, 16,</sup>  
158 <sup>17</sup>, e.g. opioids, non-opioid analgesics, antiemetics, antipsychotics, benzodiazepines,  
159 antidepressants, antiepileptics, laxatives, anticholinergics and ketamine. Drugs with  
160 medium relevance were those used relatively regularly to prevent complications (e.g.  
161 anticoagulants, levothyroxine) but were not prescribed for distressing symptoms. In  
162 addition, drugs with medium relevance were also those used less frequently (e.g.  
163 bisphosphonates, drugs for Parkinson's disease) or for a questionable indication, e.g.  
164 proton pump inhibitors and various drugs for insomnia.

165 Drugs considered to be of low relevance were generally those used for comorbidities  
166 with no or little impact on current distressing symptoms, e.g. antihypertensives,  
167 antidiabetics.

168 Descriptive statistics (frequencies and percentages) were calculated to describe and  
169 summarize all variables using Microsoft excel (version 1902).

170 The Research Ethics Committee of the Ludwig-Maximilians-Universität Munich  
171 granted ethical approval for this study (19-445).

## 172 **Results**

173 The chart review identified a total of 2,352 drug application days (d). Over the period  
 174 of one month, 93 different drugs were administered to 28 patients (15 males; 54%)  
 175 with a median age of 74 years (range 41-95) on 284 patient days. All but four  
 176 patients suffered from malignant disease. Of all drugs, 47 (51%) were used off-label  
 177 at least once.

178 Of 2,352 application days, 1,248 days (53%) were off-label. Most off-label uses  
 179 concerned the indication (56.5%), followed by mode of administration, drug dose,  
 180 and route of administration (see Fig.1).

181

182 Figure 1 about here

183

184 The drugs identified were pooled in 19 groups (Tab. 2), according to their  
 185 pharmacologic group or target symptom. The grouping was decided after discussion  
 186 in the research team. It should be noted that some drugs could appear in more than  
 187 one group if there was more than one indication or the indication remained unclear,  
 188 e.g. melperone and levomepromazine as antipsychotics and hypnotics.

| <b>Drug group</b>                    | <b>Off-label (%)</b> | <b>Application days</b> | <b>In-label (d)</b> | <b>Off-label (d)</b> |
|--------------------------------------|----------------------|-------------------------|---------------------|----------------------|
| <b>Anaesthetics<sup>a</sup></b>      | 100.0%               | 17                      | 0                   | 17                   |
| <b>Antipsychotics</b>                | 89.5%                | 95                      | 10                  | 85                   |
| <b>Antidepressants</b>               | 84.3%                | 153                     | 24                  | 129                  |
| <b>GIT-symptoms<sup>b</sup></b>      | 73.1%                | 186                     | 50                  | 136                  |
| <b>Corticosteroids</b>               | 71.0%                | 148                     | 43                  | 105                  |
| <b>Opioids</b>                       | 70.4%                | 328                     | 97                  | 231                  |
| <b>Benzodiazepine</b>                | 69.8%                | 96                      | 29                  | 67                   |
| <b>Hypnotics</b>                     | 65.4%                | 228                     | 79                  | 149                  |
| <b>Antiemetics</b>                   | 63.1%                | 195                     | 72                  | 123                  |
| <b>Respiratory tract<sup>c</sup></b> | 46.0%                | 224                     | 121                 | 103                  |
| <b>Diuretics</b>                     | 45.8%                | 72                      | 39                  | 33                   |
| <b>Anti-infectives</b>               | 38.1%                | 42                      | 26                  | 16                   |
| <b>Other</b>                         | 34.8%                | 178                     | 116                 | 62                   |



|                              |       |     |     |    |
|------------------------------|-------|-----|-----|----|
| <b>Non-opioid analgesics</b> | 29.8% | 188 | 132 | 56 |
| <b>Anticoagulation</b>       | 18.6% | 102 | 83  | 19 |
| <b>Antiepileptics</b>        | 17.8% | 174 | 143 | 31 |
| <b>Laxatives</b>             | 0%    | 130 | 130 | 0  |
| <b>Cytostatics</b>           | 0%    | 13  | 13  | 0  |
| <b>Bone metabolism</b>       | 0%    | 21  | 21  | 0  |

189 Tab.2 Drug groups used during the study period (descending order of off-label use  
190 frequency)

191 <sup>a</sup>Ketamine only drug in group

192 <sup>b</sup>Drugs for gastrointestinal symptoms (not antiemetics): esomeprazole, hyoscine butylbromide,  
193 magaldrat, pantoprazole, saccharomyces boulardii, simeticon

194 <sup>c</sup>Drugs for respiratory tract: ambroxol, budesonide, codein, dextromethorphan, formoterol, hyoscine  
195 butylbromide, ipratropium bromide, salbutamol, tiotropium bromide, tyloxapol

196 <sup>d</sup>Other drugs: amlodipine, bisoprolol, epoetin, levodopa/benserazid, levothyroxine, metoprolol,  
197 naloxone, sage extract, sitagliptin, sodium bicarbonate, sodium polystyrene sulfonate

198

### 199 *Prevalence of off-label use in different therapeutic groups*

200 The five groups with the most application days were opioids (328 d; 14%), hypnotics  
201 (228 d; 10%), respiratory tract (224 d; 10%), antiemetics (195 d; 8%), and non-opioid  
202 analgesics (188 d; 8%), see Tab.1. The group with the highest rate of off-label  
203 applications were anaesthetics, with ketamine as the only group representative. All  
204 17 days of use were outside the license, as it was used exclusively in the non-  
205 approved indication of pain. A likewise large number of uses beyond the license was  
206 documented for antipsychotics (95 d; 89%). Of these, 68 application days were  
207 related to non-licensed indications (80%). The drug mainly used in this group was  
208 quetiapine with 52 application days and an off-label/in-label ratio of 96% (50 d). Of  
209 these, 33 application days (66%) were for off-label indications like delirium or  
210 depression and supported by scientific literature. Haloperidol (9d; 100%) and  
211 levomepromazine (26d; 100%) were used less frequently, but only outside the  
212 approved indication (both used for nausea).

213 Within the group of opioids, morphine was the drug most commonly used with  
214 152/329 application days (46%). Of the 152 application days, 133 days were off-label  
215 (88%); 101 days (81%) were for the off-label indication dyspnea and supported by

216 literature recommendations. The remaining 51 applications days (38%) were related  
217 to a non-licensed use in combination with other drugs in the same syringe.

218 Antidepressants (156 d of all application days; 7%), corticosteroids (148 d of all  
219 application days; 6%), drugs for anticoagulation (102 d of all application days, 4%),  
220 diuretics (72 d of all application days; 3%) and anaesthetics (17d of all application  
221 days; 0.7%) differed from all other groups as all uses beyond the license were solely  
222 for off-label indications and not for other reasons. In the antidepressant group,  
223 mirtazapine (112 d), trimipramine (7 d) and venlafaxin (14 d) summed up to a total of  
224 133 days and 97% off-label/in-label-ratio. In the corticosteroid group, all off-label  
225 administrations were related to dexamethasone (105 d off-label use; 8% off-label  
226 use). Of these five drug groups, diuretics had a relatively low off-label/in-label-ratio  
227 (33 d off-label use; 46%), and the off-label days were mainly caused by the use of  
228 torasemide (26d) for a differing indication. Dexamethasone and torasemide were  
229 both prescribed for edema, dexamethasone additionally for pain. Mirtazapine and  
230 trimipramine were used for insomnia, mirtazapine additionally for pain. Venlafaxine  
231 was used for pain and aspirin in atrial fibrillation. None of these indications were  
232 supported by the literature specified above.

233 In addition to the drug groups, another 20 drugs (22% of all drugs used) were only  
234 used off-label. Twelve drugs were always used in differing indications, s. fig 2 Other  
235 drugs with 100% off-label application days were bisoprolol, levomethadone,  
236 meropenem, simeticone, sitagliptin, budesonide/formoterol, thyme juice, and tilidine.

237 Figure 2 about here

### 238 *Drug relevance in palliative care*

239 The 93 drugs used during the observation period were stratified into groups  
240 according to their relevance for palliative care pharmacotherapy (high, medium, low).  
241 30 (32%) drugs were considered as highly relevant, e.g. ketamine, haloperidol,  
242 hyoscine butylbromide, and morphine. The relevance is also reflected by the total  
243 application days of this group. Of 1432/2352 (67%) application days attributable to  
244 drugs in this group, 902 days (63%) were off-label. For 14 of these drugs some  
245 evidence for off-label use could be identified in the literature screened. The type of  
246 off-label use and underlying evidence is displayed in table 3.

247

248

|                           | Type of off-label use (displayed in applications days) |               |            |      |          |           |          |                        |       | Off-label indication                          | Underlying evidence   |
|---------------------------|--------------------------------------------------------|---------------|------------|------|----------|-----------|----------|------------------------|-------|-----------------------------------------------|-----------------------|
|                           | Application days                                       | Off-label use | Indication | Dose | Interval | Titration | Duration | Mode of Administration | Route |                                               |                       |
| <b>Buprenorphine</b>      | 4                                                      | -             | -          | -    | -        | -         | -        | -                      | -     | -                                             | -                     |
| <b>Butylscopolamin</b>    | 28                                                     | 27            | 21         | -    | -        | -         | -        | 36                     | -     | mostly noisy secretions                       | German Guideline, APM |
| <b>Dexamethasone</b>      | 134                                                    | 105           | 105        | -    | -        | -         | -        | -                      | 8     | mostly edema                                  | German Guideline, APM |
| <b>Dimenhydrinate</b>     | 12                                                     | 6             | -          | -    | -        | -         | -        | -                      | 6     | -                                             | -                     |
| <b>Domperidone</b>        | 1                                                      | -             | -          | -    | -        | -         | -        | -                      | -     | -                                             | -                     |
| <b>Fentanyl</b>           | 33                                                     | 21            | 21         | -    | -        | -         | -        | -                      | -     | dyspnea                                       | German Guideline, APM |
| <b>Granisetron</b>        | 21                                                     | 21            | 18         | -    | -        | -         | -        | 2                      | 20    | nausea/vomiting (not chemotherapy associated) | APM                   |
| <b>Haloperidol</b>        | 9                                                      | 9             | 9          | -    | -        | -         | -        | -                      | 2     | nausea                                        | APM                   |
| <b>Hydromorphone</b>      | 75                                                     | 49            | 22         | -    | -        | -         | -        | 25                     | -     | dyspnea                                       | German Guideline, APM |
| <b>Ketamine</b>           | 17                                                     | 17            | 17         | -    | -        | -         | -        | 8                      | -     | pain                                          | APM                   |
| <b>Lacosamide</b>         | 23                                                     | 5             | -          | -    | -        | 5         | -        | -                      | -     | -                                             | -                     |
| <b>Sodiumpicosulphate</b> | 55                                                     | -             | -          | -    | -        | -         | -        | -                      | -     | -                                             | -                     |
| <b>Levetiracetam</b>      | 49                                                     | 20            | -          | -    | -        | 3         | -        | 12                     | 13    | -                                             | -                     |
| <b>Levomepromazin</b>     | 26                                                     | 26            | 26         | -    | -        | -         | -        | 4                      | 15    | nausea/vomiting                               | APM                   |

| e                            |     |     |     |    |   |   |    |    |    |                                               | miting                |   |
|------------------------------|-----|-----|-----|----|---|---|----|----|----|-----------------------------------------------|-----------------------|---|
| <b>Levomethadone</b>         | 1   | 1   | -   | -  | - | - | -  | 1  | -  | -                                             | -                     | - |
| <b>Lorazepam</b>             | 35  | 6   | -   | -  | 2 | - | -  | 4  | -  | -                                             | -                     | - |
| <b>Metoclopramide</b>        | 101 | 65  | -   | 6  | - | - | 35 | 44 | 4  | -                                             | -                     | - |
| <b>Melperone</b>             | 8   | -   | -   | -  | - | - | -  | -  | -  | -                                             | -                     | - |
| <b>Metamizole (dipyrone)</b> | 174 | 48  | -   | -  | - | - | -  | 96 | 13 | -                                             | -                     | - |
| <b>Midazolam</b>             | 61  | 61  | 61  | -  | - | - | -  | 58 | 22 | agitation, anxiety                            | German Guideline, APM | - |
| <b>Mirtazapine</b>           | 112 | 108 | 108 | -  | - | - | -  | -  | -  | insomnia, pain                                | APM                   | - |
| <b>Morphine</b>              | 152 | 133 | 101 | -  | - | - | -  | 51 | -  | dyspnea                                       | German Guideline, APM | - |
| <b>Movicol</b>               | 69  | -   | -   | -  | - | - | -  | -  | -  | -                                             | -                     | - |
| <b>Ondansetron</b>           | 2   | 2   | 2   | -  | - | - | -  | -  | -  | nausea/vomiting (not chemotherapy associated) | APM                   | - |
| <b>Piritramid</b>            | 59  | 36  | 11  | 18 | - | - | -  | 22 | -  | dyspnea                                       | German Guideline, APM | - |
| <b>Pregabalin</b>            | 102 | 6   | 0   | 6  | - | - | -  | -  | -  | -                                             | -                     | - |
| <b>Quetiapine</b>            | 52  | 50  | 33  | 17 | - | - | -  | 26 | -  | delirium, agitation                           | APM                   | - |
| <b>Tapentadol</b>            | 1   | -   | -   | -  | - | - | -  | -  | -  | -                                             | -                     | - |
| <b>Tilidin</b>               | 2   | 2   | -   | 2  | - | - | -  | -  | -  | -                                             | -                     | - |
| <b>Venlafaxine</b>           | 14  | 14  | 14  | -  | - | - | -  | -  | -  | -                                             | -                     | - |

249 Table 3. Type of off-label use for drugs highly relevant in palliative care during the  
250 study period (displayed in application days)

251

252 With decreasing relevance of the groups for symptom control, the total number of  
253 application days as well as the off-label/in-label ratio dropped: the group of medium  
254 relevant drugs (40; 43%; e.g. pantoprazole, enoxaparin) accounted for 714/2352  
255 (30%) of all application days; of these 255/714 (36%) were off-label. The group with  
256 the lowest relevance accounted for only 9% (210) of all application days with a total  
257 of 83 (40%) off-label application days.

258

## 259 **Discussion**

260 Little is known about off-label drug use in palliative care in different national and  
261 institutional circumstances. This article provides a first detailed evaluation of off-label  
262 use on a palliative care unit in Germany. We aimed to get insights into off-label  
263 prescribing and therefore critically evaluated not only the indication but also other  
264 areas of off-label use, such as drug dose, dosing interval, route and mode of  
265 administration. To our knowledge such an extensive assessment of off-label drug use  
266 has not been published for adult palliative care previously.

267 Off-label use was common in this unit with more than half of all drug uses outside the  
268 marketing authorisation. Compared to other studies, the frequency of off-label use  
269 was rather high in our sample<sup>1</sup>. This can partially be explained by the fact that we  
270 evaluated off-label use not only with regard to indication but to six other aspects of  
271 the approval (i.e. dose, mode of application, etc.). The large proportion of off-label  
272 use regarding the indications was hardly surprising. Many drugs are not approved for  
273 the relatively specific indications in palliative medicine. Still, compared to publications  
274 from the UK (14.5%<sup>2</sup>) and the US (up to 35%<sup>18</sup>), the frequency of off-label use was  
275 remarkably high. The extent to which the use deviated from the actual approval was  
276 very heterogeneous. Midazolam, for example, is authorized for sedation in intensive  
277 care but not in palliative medicine. In comparison, the established palliative care  
278 indication of dyspnea for opioids is not even close to being covered by the approval  
279 in Germany, although very well covered by scientific evidence<sup>19, 20</sup>. In our study, the  
280 application mode was the second most common cause for off-label use. The reason  
281 for this was almost exclusively the non-approved mixing of different substances in a  
282 syringe and the subsequent application as continuous infusion. Since data on the  
283 compatibility of the mixtures used and on the benefit of a continuous infusion

284 compared to intermittent injections are only available to a very limited extent, this  
285 practice must be critically questioned and discussed in more detail. A route of  
286 administration beyond the approval only came in fourth place in our evaluation.  
287 However, when considering subcutaneous administration alone, our assumptions of  
288 more common off-label use were confirmed. These findings are consistent with other  
289 studies evaluating subcutaneous administration in palliative care (62-85%<sup>2, 21</sup>).

290 Among drugs and drug groups frequently used off-label were ketamine,  
291 antipsychotics, antidepressants, drugs for gastrointestinal symptoms, corticosteroids  
292 and opioids. These were frequently identified in other studies in the context of off-  
293 label use and palliative care as well<sup>2, 18, 22</sup>. Based on these findings it seems that  
294 common symptoms in advanced disease like dyspnoea, nausea or vomiting either  
295 lack authorized therapies or licensed alternatives are not used. Possible reasons for  
296 the latter, however, cannot be determined due to the retrospective study design.

297 An important finding is the high number of overall off-label application days, the  
298 proportion of off-label days in the group of “highly relevant” palliative care drugs, and  
299 the decreasing number of overall and off-label application days with decreasing  
300 relevance of a drug. This results underpins the high relevance of off-label use in  
301 palliative medicine. However, this does not allow for conclusions on the justification  
302 of off-label drug use in palliative medicine. Especially the lack of evidence to support  
303 off-label use and the high proportion of off-label days without evidence need to be  
304 noted. This proportion is rather high compared to other studies (3-11%<sup>2, 18</sup>). Although  
305 we have compared our data with two well-known and established  
306 references<sup>14, 23</sup>, this approach does only allow limited conclusions on the quality of  
307 the underlying evidence.

308 We assessed off-label use with regard to every aspect of the marketing authorisation,  
309 the relevance of drugs for palliative care and the availability of explicit literature  
310 references. Data available so far still only allows limited insights into off-label  
311 prescribing behaviour in different institutions and in different national contexts,  
312 though. Reasons that led to a therapeutic decision cannot be illustrated. It is also not  
313 clear what role patient-specific or infrastructural factors played in the treatment  
314 selection. To be able to continue working with our and previous findings, it is  
315 important to have the opportunity to compare off-label use in different institutions and  
316 different countries. Such data can serve as a benchmark for quality assurance; they

317 can help to identify areas that seem to represent therapy standards but with no or  
318 very little available evidence on the other. They can also be used to identify  
319 therapeutic strategies that may be outdated by other approaches. Based on such  
320 comparisons it would also be possible to develop quality indicators for off-label use in  
321 palliative care. Our results demonstrate that there are multiple opportunities for  
322 pharmacists to support off-label use of drugs in clinical routine, especially when  
323 evaluating a treatment or possible treatment alternatives.

324 This study has several limitations. Data extraction was restricted to one month in one  
325 palliative care unit. Therefore, data collection on off-label use from different palliative  
326 care institutions in Germany is currently being prepared as a follow-up project.  
327 Retrospective data collection relies on the quality of the documentation as wrong or  
328 missing data cannot be replaced or completed. We were able to extract the required  
329 data for all patients that were treated during the period analysed and, in most cases,  
330 ambiguities could be resolved based on the patient records. The data presented here  
331 is from 2017 and might be considered outdated. However, for a retrospective  
332 evaluation of prescribing data, a time delay until the data is available should always  
333 be expected. Furthermore an update and extension of the German Guideline on  
334 Palliative Medicine for Patients with Incurable Cancer<sup>24</sup> has been published and its  
335 influence on prescribing behaviour is not clear. It will therefore be interesting to  
336 compare whether it had an impact on off-label prescribing behaviour.

337 Off label use is an integral part of palliative medicine. With very strict consideration,  
338 which does not only focus on the indication, the extent may be even greater than  
339 previously known. Off-label use should not be a routine but rather encourage to  
340 question a therapy. At the same time, however, it must be possible to prescribe well-  
341 established and scientifically sound therapies without justification if appropriate for an  
342 individual patient. Ultimately, it is important to critically question the necessity of  
343 every drug - whether inside or outside the marketing authorisation, for every patient.  
344 As an important first step, the data presented here allow for a more precise  
345 characterization of various aspects of off-label use in everyday clinical practice in  
346 order to use this knowledge to derive concrete further measures for research and  
347 clinical practice. As a follow-up to this pilot study, the next step will be to collect and  
348 evaluate data on off-label use in various palliative care settings. These results will  
349 then be used, in part, for quality assurance in the off-label drug use in palliative care.

350

351 **Conflict of interest statement**

352 The Authors declare that there are no competing interests. This project did not  
353 receive funding.

354

355 **Acknowledgements**

356 The authors would like to thank Stefanie Büsel for assisting in the data extraction  
357 process.

358



## References

1. Hagemann V, Bausewein C, Remi C. Drug use beyond the licence in palliative care: A systematic review and narrative synthesis. *Palliative Medicine*. 2019;33(6):650-62.
2. Atkinson C, Kirkham S. Unlicensed uses for medication in a palliative care unit. *Palliative Medicine*. 1999;13:145–52.
3. Todd J, Davies A. Use of unlicensed medication in palliative medicine. *Palliative Medicine*. 1999;13:466.
4. García-López I, Cuervas-Mons Vendrell M, Martín Romero I, de Noriega I, Benedí González J, Martino-Alba R. Off-Label and Unlicensed Drugs in Pediatric Palliative Care: A Prospective Observational Study. *Journal of pain and symptom management*. 2020.
5. FDA. Understanding Unapproved Use of Approved Drugs "Off Label" [cited 2019 Feb 05]. 2018 [updated 02/05/201808/02/2019]. Available from: <https://www.fda.gov/forpatients/other/offlabel/default.htm>.
6. Aronson JK, Ferner RE. Unlicensed and off-label uses of medicines: definitions and clarification of terminology. *Br J Clin Pharmacol*. 2017;83(12):2615-25.
7. Johnson MJ, Currow DC. Opioids for breathlessness: a narrative review. *BMJ supportive & palliative care*. 2020;10(3):287-95.
8. Gremaud G, Zulian GB. Indications and Limitations of Intravenous and Subcutaneous Midazolam in a Palliative Care Center. *Journal of pain and symptom management*. 1998;15(6):331-3.
9. Amesbury BDW, Dunphy KP. The use of subcutaneous midazolam in the home care setting. *Palliative Medicine*. 1989;3:299–301.
10. Eguale T, Buckeridge DL, Verma A, Winslade NE, Benedetti A, Hanley JA, et al. Association of Off-label Drug Use and Adverse Drug Events in an Adult Population. *JAMA internal medicine*. 2016;176(1):55-63.
11. Hagemann V, Bausewein C, Rémi C. Off-label-prescriptions in daily clinical practice – a cross-sectional national survey of palliative medicine physicians. *Progress in Palliative Care*. 2019:1-6.
12. Nationale Akademie der Wissenschaften Leopoldina und Union der deutschen Akademien der Wissenschaften. Palliativversorgung in Deutschland – Perspektiven

für Praxis und Forschung. 2015. Available from:

[http://www.leopoldina.org/uploads/tx\\_leopublication/2015\\_Palliativversorgung\\_LF\\_D\\_E.pdf](http://www.leopoldina.org/uploads/tx_leopublication/2015_Palliativversorgung_LF_D_E.pdf).

13. von Elm E, Altman DG, Egger M, Pocock SJ, Gøtzsche PC, Vandenbroucke JP. The Strengthening the Reporting of Observational Studies in Epidemiology (STROBE) Statement: guidelines for reporting observational studies. *International journal of surgery (London, England)*. 2014;12(12):1495-9.

14. Leitlinienprogramm Onkologie. S3-Leitlinie Palliativmedizin für Patienten mit einer nicht-heilbaren Tumorerkrankung 2015 [Available from:

[http://leitlinienprogramm-onkologie.de/uploads/tx\\_sbdownloader/LL\\_Palliativmedizin\\_Langversion\\_1\\_1.pdf](http://leitlinienprogramm-onkologie.de/uploads/tx_sbdownloader/LL_Palliativmedizin_Langversion_1_1.pdf).

15. Rémi C, Bausewein C, Twycross R, Wilcock A, Howard P, editors.

Arzneimitteltherapie in der Palliativmedizin. 2 ed. München: Urban & Fischer; 2015.

16. Essential medicine in palliative care: executive summary [Internet]. 2013 [cited 14.08.2015]. Available from:

[http://www.who.int/selection\\_medicines/committees/expert/19/applications/PalliativeCare\\_8\\_A\\_R.pdf](http://www.who.int/selection_medicines/committees/expert/19/applications/PalliativeCare_8_A_R.pdf).

17. Nauck F, Ostgathe C, Klaschik E, Bausewein C, Fuchs M, Lindena G, et al. Drugs in palliative care: results from a representative survey in Germany. *Palliative Medicine*. 2004;18:100-7.

18. Kwon JH, Kim MJ, Bruera S, Park M, Bruera E, Hui D. Off-label Medication Use in the Inpatient Palliative Care Unit. *J Pain Symptom Manage*. 2017.

19. Ekstrom M, Bajwah S, Bland JM, Currow DC, Hussain J, Johnson MJ. One evidence base; three stories: do opioids relieve chronic breathlessness? *Thorax*. 2017;73(1):88-90.

20. Barnes H, McDonald J, Smallwood N, Manser R. Opioids for the palliation of refractory breathlessness in adults with advanced disease and terminal illness. *Cochrane Database Syst Rev*. 2016;3:Cd011008.

21. Toscani F, Di Giulio P, Campi R, Pellerin I, De Luca A, Casale G. Off-label prescriptions in Italian hospices: a national survey. *J Pain Symptom Manage*. 2009;38(3):365-71.

22. Culshaw J, Kendall D, Wilcock A. Off-label prescribing in palliative care: a survey of independent prescribers. *Palliative Medicine*. 2013;27(4):314-9.

23. Rémi C, Bausewein C, Twycross R, Wilcock A, Howard P, editors.  
Arzneimitteltherapie in der Palliativmedizin. 3 ed. München: Elsevier Urban & Fischer; 2018.
24. Leitlinienprogramm Onkologie. Erweiterte S3-Leitlinie Palliativmedizin für Patienten mit einer nicht-heilbaren Krebserkrankung. Langversion 2.0–August 2019  
AWMF-Registernummer: 128/001-OL 2019 [Available from:  
[https://www.leitlinienprogramm-onkologie.de/fileadmin/user\\_upload/Downloads/Leitlinien/Palliativmedizin/Version\\_2/LL\\_Palliativmedizin\\_2.0\\_Langversion.pdf](https://www.leitlinienprogramm-onkologie.de/fileadmin/user_upload/Downloads/Leitlinien/Palliativmedizin/Version_2/LL_Palliativmedizin_2.0_Langversion.pdf)].

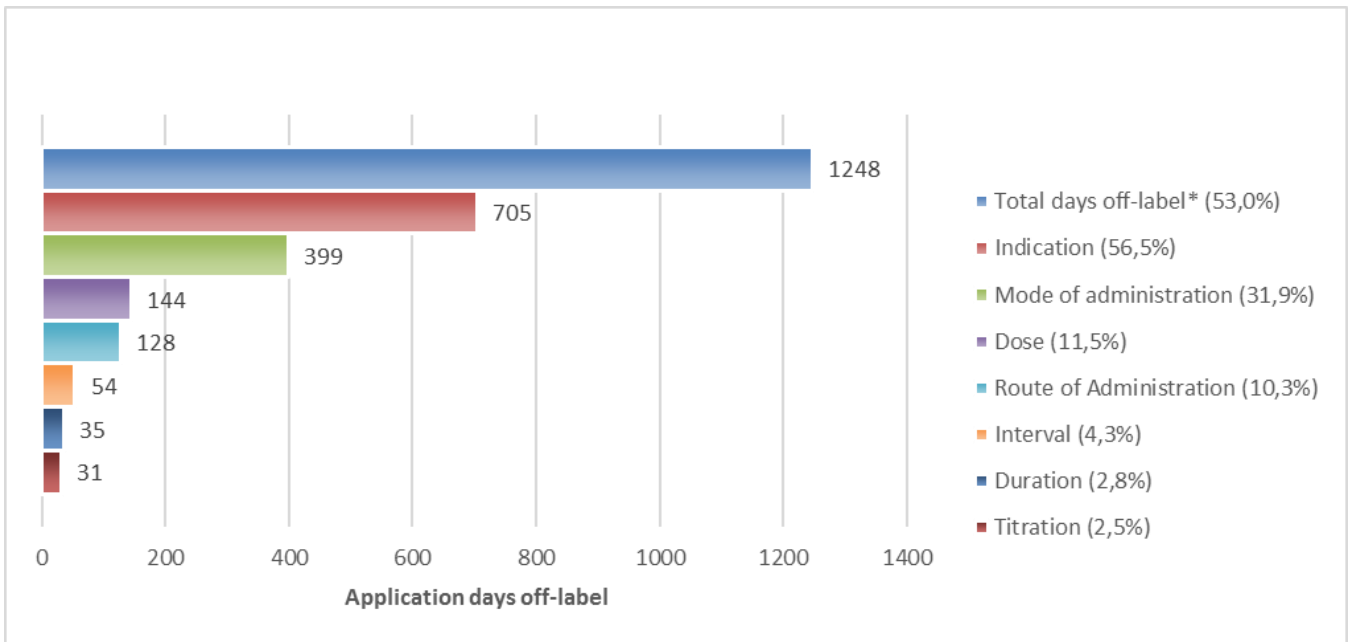

**Fig. 1 Frequency of off-label application days by type of off-label use**

total number of drug applications days (in-label and off-label): 2,352

\*off-label uses could occur in more than one category resulting in a higher total number of off-label uses than application days.

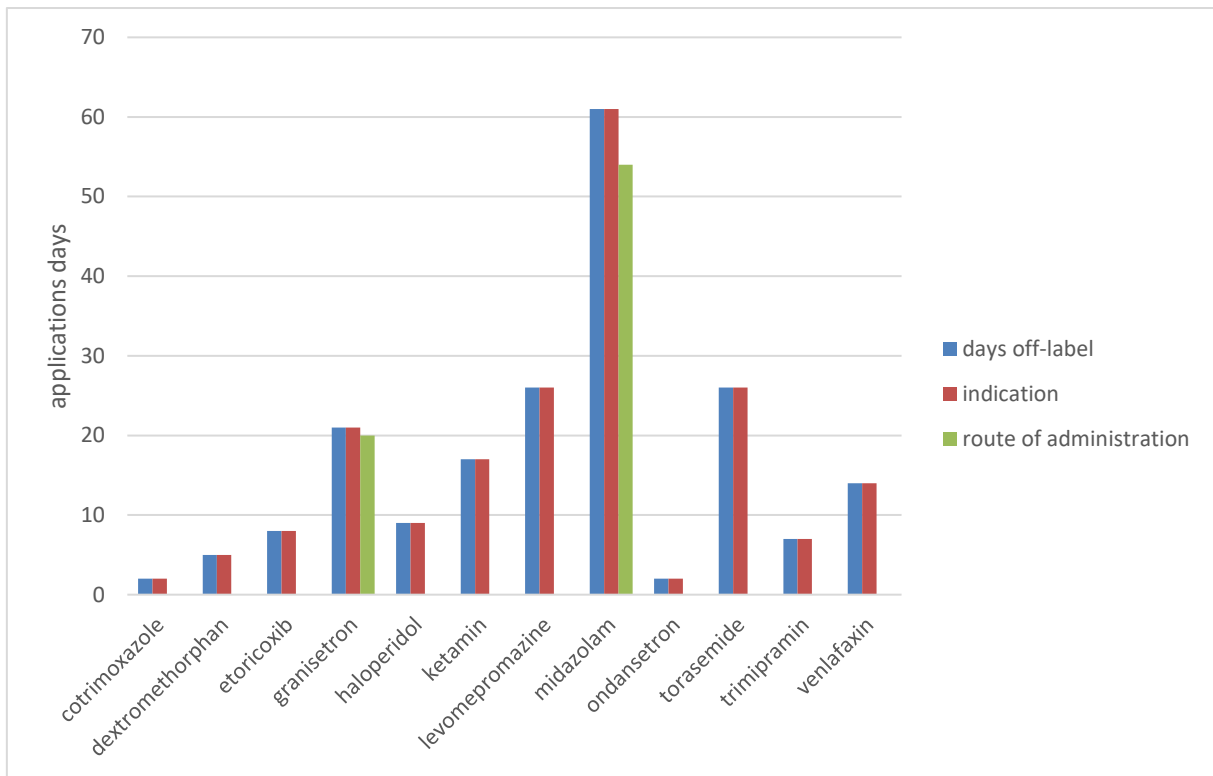

**Fig. 2 Applications days of drugs solely used off-label**

Only drugs that have solely been used outside the approved indication are listed.
